# Supplementary figures and images for: Persistent Health Issues, Adverse Events, and Effectiveness of Vaccines during the Second Wave of COVID-19: A Cohort Study from a Tertiary Hospital in North India
Source: MDPI journal article supplement (doi:10.3390/vaccines10071153), 2022-07-20

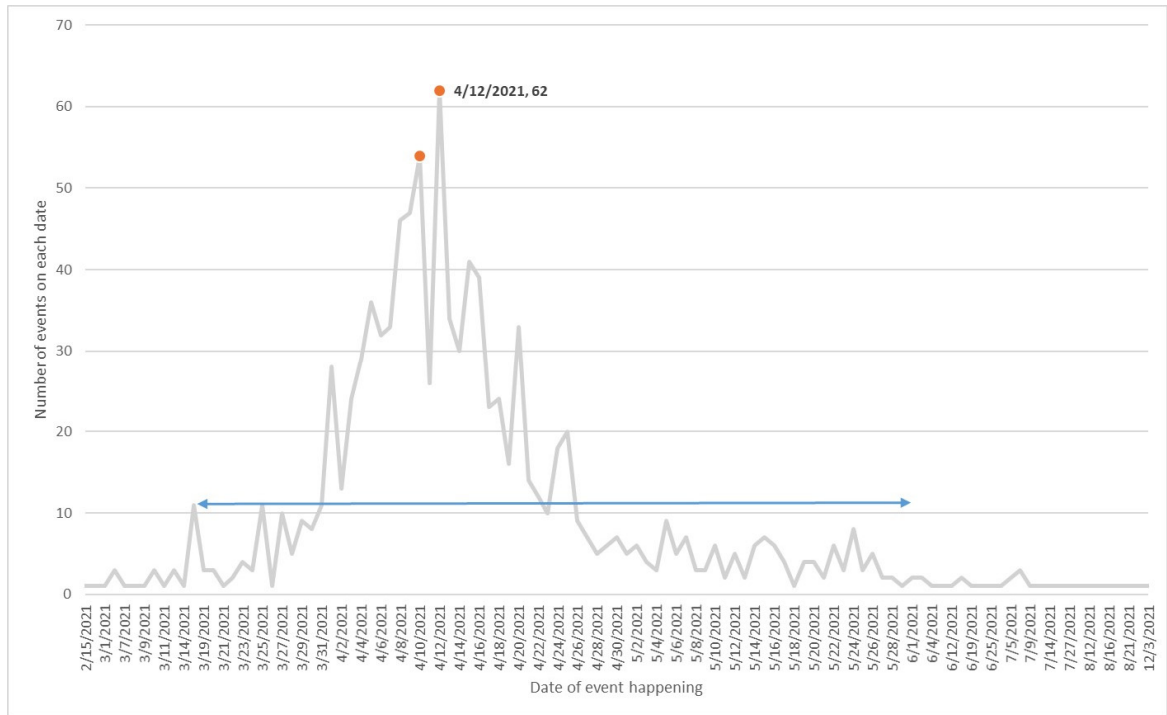

**Figure S1.** Date-wise COVID-19 case counts during second wave in study population.

Supplement: s1 [file s1]
